# Supplementary material for: Endoplasmic reticulum tubules limit the size of misfolded protein condensates
Source: eLife journal article supplement (doi:10.7554/elife.71642), 2021-09-01
Supplement: fig2-data1 [file elife-71642-fig2-data1-v2.zip]

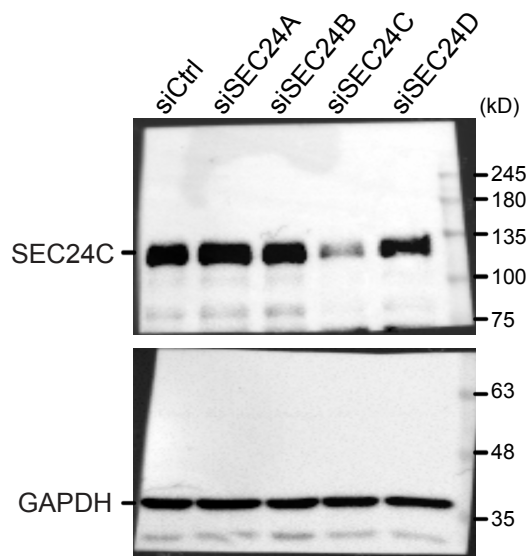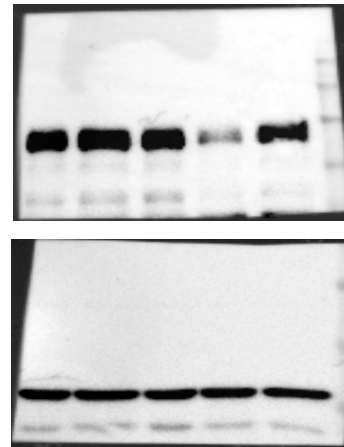

**Figure 2-source data 1. Uncropped blots for Figure 2B.**

Left top, labeled SEC24C blot of uncropped raw blot on the right. Left bottom, labeled GAPDH blot of uncropped raw blot on the right.
