# Supplementary material for: Endoplasmic reticulum tubules limit the size of misfolded protein condensates
Source: eLife journal article supplement (doi:10.7554/elife.71642), 2021-09-01
Supplement: fig5-figsupp5-data1 [file elife-71642-fig5-figsupp5-data1-v2.zip]

|                    |   |   |      |
|--------------------|---|---|------|
| Glucose (2.8 mM)   | + | - |      |
| Glucose (11.11 mM) | - | + | (kD) |

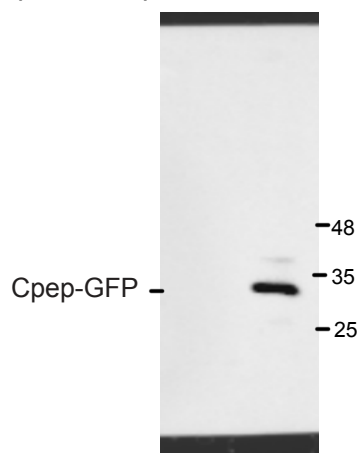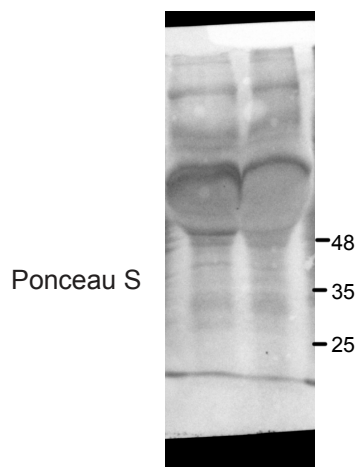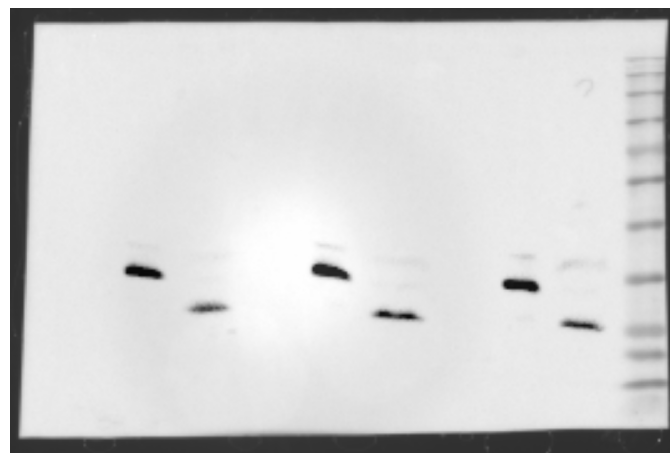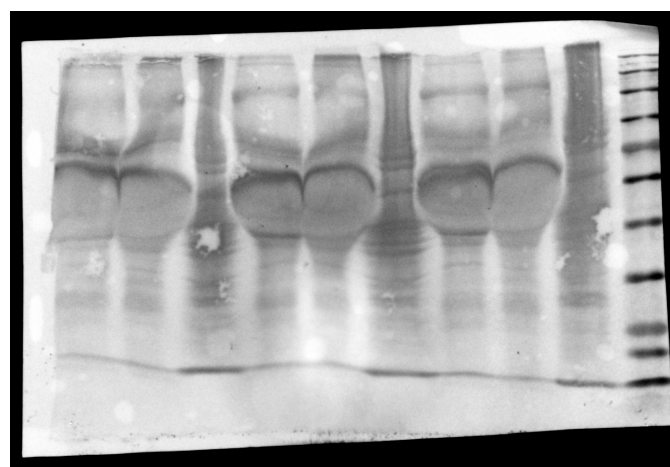

**Figure 5-source data 1. Uncropped blots for Figure supplement 5D.**

Left top, labeled Cpep-GFP blot of uncropped raw blot on the right. Left bottom, labeled Ponceau S-stained blot of uncropped raw blot on the right.
