# Supplementary material for: Endoplasmic reticulum tubules limit the size of misfolded protein condensates
Source: eLife. 2021 Sep 1;10:e71642. doi: 10.7554/eLife.71642 (PMC8486381; doi:10.7554/eLife.71642)
Supplement: Figure 2—figure supplement 1—source data 2. [file elife-71642-fig2-figsupp1-data2.zip]

Archive with 10 entries (9 files):
- Figure 2-source data 3-Raw images/
- __MACOSX/._Figure 2-source data 3-Raw images
- Figure 2-source data 3-Raw images/SEC24C blot.tif
- __MACOSX/Figure 2-source data 3-Raw images/._SEC24C blot.tif
- Figure 2-source data 3-Raw images/GAPDH blot.tif
- __MACOSX/Figure 2-source data 3-Raw images/._GAPDH blot.tif
- Figure 2-source data 3-Raw images/RTN3 blot.tif
- __MACOSX/Figure 2-source data 3-Raw images/._RTN3 blot.tif
- Figure 2-source data 3.pdf
- __MACOSX/._Figure 2-source data 3.pdf
